# Supplementary material for: Effects of Incorporating Different Proportions of Humic Acid into Phosphate Fertilizers on Phosphorus Migration and Transformation in Soil
Source: MDPI journal article supplement (doi:10.3390/agronomy13061576), 2023-06-10
Supplement: s1 [file s1]

## Supporting Information

**Table S1 Soil phosphorus activation coefficient in 40–45, 45–50, 50–55mm soil layer from fertilization layer.**

| Phosphate fertilizer | 40–45 mm (%)   | 45–50 mm (%)    | 50–55 mm (%)  |
|----------------------|----------------|-----------------|---------------|
| CP                   | 47.86 ± 3.71 a | 7.65 ± 0.62 d   | 2.20 ± 0.25 d |
| HAP0.1               | 48.41 ± 8.11 a | 7.73 ± 0.58 d   | 2.31 ± 0.11 d |
| HAP0.5               | 40.86 ± 0.41 a | 35.70 ± 1.50 c  | 3.60 ± 0.37 c |
| HAP1                 | 46.52 ± 2.99 a | 38.54 ± 0.81 bc | 6.44 ± 0.38 b |
| HAP5                 | 45.28 ± 4.38 a | 43.60 ± 7.48 b  | 7.39 ± 0.51 a |
| HAP10                | 48.41 ± 0.85 a | 58.67 ± 5.66 a  | 6.36 ± 0.16 b |

Means with no letter in common were significantly different at  $P < 0.05$ , as indicated by the LSD test.

**Table S2 Soil total PLFA, bacteria, gram-positive bacteria (Gm+), gram-negative bacteria (Gm-), fungi, and actinobacteria biomass, fungi:bacteria (F/B), and Gram-positive:Gram-negative (Gm+/Gm-) in the 0–40 mm soil layers around the P application site under NTC, CP, and HAP0.5 treatments.**

| Treatment | Total PLFA<br>(nmol g <sup>-1</sup> ) | Bacteria<br>(nmol g <sup>-1</sup> ) | Gm+<br>(nmol g <sup>-1</sup> ) | Gm-<br>(nmol g <sup>-1</sup> ) | Fungi<br>(nmol g <sup>-1</sup> ) | Actinobacteria<br>(nmol g <sup>-1</sup> ) | F:B         | Gm+/Gm-     |
|-----------|---------------------------------------|-------------------------------------|--------------------------------|--------------------------------|----------------------------------|-------------------------------------------|-------------|-------------|
| NTC       | 11.5 ± 1.1 a                          | 2.9 ± 0.4 a                         | 0.6 ± 0.1 a                    | 0.3 ± 0.0 a                    | 1.4 ± 0.2 a                      | 0.6 ± 0.1 a                               | 0.4 ± 0.1 a | 2.1 ± 0.1 a |
| CP        | 7.9 ± 0.6 b                           | 2.1 ± 0.1 b                         | 0.4 ± 0.0 b                    | 0.2 ± 0.0 a                    | 0.7 ± 0.1 b                      | 0.5 ± 0.0 a                               | 0.3 ± 0.0 b | 1.7 ± 0.5 a |
| HAP0.5    | 8.2 ± 1.5 b                           | 2.3 ± 0.4 ab                        | 0.4 ± 0.1 b                    | 0.3 ± 0.0 a                    | 0.8 ± 0.1 b                      | 0.5 ± 0.1 a                               | 0.2 ± 0.0 b | 1.6 ± 0.2 a |

Means with no letter in common were significantly different at  $P < 0.05$ , as indicated by the LSD test.

**Table S3 Correlation of soil total PLFA, bacteria, gram-positive bacteria (Gm+), gram-negative bacteria (Gm-), fungi, and actinobacteria biomass, fungi:bacteria (F/B), and Gram-positive:Gram-negative (Gm+/Gm-) in the 0–40 mm soil layers around the P application site with average TP and AP.**

| Parameter | Total PLFA | Bacteria | Gm+       | Gm-    | Fungi      | Actinobacteria | F:B       | Gm+/Gm- |
|-----------|------------|----------|-----------|--------|------------|----------------|-----------|---------|
| TP        | –0.863 **  | –0.758 * | –0.796 *  | –0.300 | –0.900 *** | –0.572         | –0.875 ** | –0.640  |
| AP        | –0.880 **  | –0.784 * | –0.820 ** | –0.319 | –0.907 *** | –0.606         | –0.864 ** | –0.651  |

Values represented correlation coefficients, \*  $P < 0.05$ ; \*\*  $P < 0.01$ , \*\*\*  $P < 0.001$ .
